# Supplementary material
Source: Elsevier journal article supplement (https://authors.library.caltech.edu/72313/3/mmc2.xlsx)
Supplement: mmc2 [file mmc2.xlsx]

## Sheet: Sheet1
Esrrb	tggacttccaactccacaga
Esrrb	caagcaaaacagccaaaacc
Esrrb	aatcccacaaccataaccag
Esrrb	ggcagctgacagaaaagaaa
Esrrb	ccagactccgtgattgatat
Esrrb	ggacacagtactctcaaact
Esrrb	gtctgtgtctctttgtgact
Esrrb	tccaacaccagctgacagtc
Esrrb	tcatgactcgttgcttggct
Esrrb	aaaggttaccctcaggtgtt
Esrrb	ttcggttcagcagcatggtt
Esrrb	atgaaggagccgcaactaga
Esrrb	tggtggctgagggcatcaat
Esrrb	aatgccaaagccaccactgg
Esrrb	tacagtcctcgtagctcttg
Esrrb	gagtcctccatgataccact
Esrrb	catgtactcgcatttgatgg
Esrrb	tagtggtagccagaggcaat
Esrrb	tcttgaagaacgccttgcaa
Esrrb	tcgatgttgccttgaatggt
Esrrb	atctcacattcattggtggc
Esrrb	aggcatttcatgaatcggca
Esrrb	ttccttcagcatccccactt
Esrrb	agccgtcgcttgtacttctg
Esrrb	gtaggggctgttctccgaat
Esrrb	tttagcaggtggggaaatcg
Esrrb	agacgatcttagtcaatggc
Esrrb	tgctcaacccctagtagatt
Esrrb	aggcatagcatacagcttgt
Esrrb	atatctccctcggggatatc
Esrrb	aattcacagagagtggtcag
Esrrb	gaacacaagctcccgatctg
Esrrb	atgtgcttggcccagttgat
Esrrb	aagtgtcagactggggaagc
Esrrb	actctgcagcaggctcatct
Esrrb	agatgagaatctccatccag
Esrrb	atgccagcttgtcatcgtat
Esrrb	tccatgatatagtcctcggc
Esrrb	taccaggcgagagtgttcct
Esrrb	atggctcggtaaaggtccag
Esrrb	ttgagtttcttgtacctgcg
Esrrb	gccttgaggatcataaactc
Esrrb	tcgaatctgagttggcgagg
Esrrb	gcctccaggttctcaatgta
Esrrb	actcagctcatagtcctgca
Esrrb	agaagtgttgcacggctttg
Esrrb	ttgccctgcagtttcacact
Esrrb	tccaggaagagtttgtgcat
Tbx3	ataaccggatctctcatgga
Tbx3	tgaggtaggaagggatgata
Tbx3	aactgatccatgatgggctt
Tbx3	tcttcagaggcctcagatgt
Tbx3	ttctacgtcttcttcgggtt
Tbx3	aactggtcccaaagttcctt
Tbx3	tcgtgatgaccatctctgta
Tbx3	ttaaacggagggaacattcg
Tbx3	ttttatccagtccagagcac
Tbx3	cagcagctataatgtccatc
Tbx3	ccaccgagagttgtgaaatt
Tbx3	attctctttggcatttcggg
Tbx3	actttggacatccattgctc
Tbx3	ggtgagtttcagtttgtgga
Tbx3	ggccaaagtaaatccgtgtt
Tbx3	tataattcccctgccacgtt
Tbx3	tttagtatagtctgggtccc
Tbx3	atatcgttggctctgacgat
Tbx3	cgaaaagtactgtaaggcag
Tbx3	aattctgtttccgggaacag
Tbx3	attctgataggcagtaacgg
Tbx3	gcaaagggattgttgtctat
Tbx3	attgccagtgtctcgaaaac
Tbx3	cagtgtgagctgctttcttt
Tbx3	tctcctcaaacactctcatg
Tbx3	tcatccgaagtctccttctt
Tbx3	aaagcagttgaaggctgcct
Tbx3	atctttgaggttggatgtcc
Tbx3	tagtggtggaaatcttggcc
Tbx3	tgtgtaggggtaaggaaaca
Tbx3	ttcaaattgaggaacgggtg
Tbx3	attgatggtaaagctgtggc
Tbx3	tcttgtttttaaggggaccc
Tbx3	aactggaatggagagacctt
Tbx3	caaagtgcactggcagattt
Tbx3	ggcccgtggtttattttaca
Tbx3	acaaaactgaaagggacagg
Tbx3	gaaaggctttagtgctccct
Tbx3	cctgtggtatctagcatagt
Tbx3	tttcaaagcaacagcagcct
Tbx3	acacaaaagcctgtttgcca
Tbx3	ataccagcctgcacaaaagt
Tbx3	ttccggtgaagtctctcaaa
Tbx3	ttccactaaacacacgaagg
Tbx3	ttagtttgtttaggaggggg
Tbx3	agttccacaggacttcatct
Tbx3	gcaattggtgagtttcagtc
Tbx3	ttctctctgccccaacgaaa
Zscan4c	ttggtctgaaggtcttttgc
Zscan4c	gcacaccagaactatcagtt
Zscan4c	ttagagatgtcttctgccca
Zscan4c	aagtttagctgagcacttgg
Zscan4c	ccagcagccattgttacttg
Zscan4c	gactttgcagctcctgagtt
Zscan4c	ccaggagttgaacatcttcc
Zscan4c	ttagtctgcttttctggctg
Zscan4c	ccagttgagaaatcatctgc
Zscan4c	gtgaggagaaactgctccaa
Zscan4c	aaagcatacttgtccttgca
Zscan4c	atatcgctaccactggcttt
Zscan4c	caagcactcatcagtcagac
Zscan4c	tgaaacatggaccatgacag
Zscan4c	cagaaaagagggcttcttgt
Zscan4c	tcaaaagcttgatgacttct
Zscan4c	cttgttgcagattgctgttg
Zscan4c	tctgctcattatctggtgtt
Zscan4c	atcttgtgtggtgtctactg
Zscan4c	actgttttcttgtcctgtgg
Zscan4c	acaagagttgttgcattcat
Zscan4c	ccaacatttgcttcagtagc
Zscan4c	gggagtccatttcatttcca
Zscan4c	ggtgctgttctttctggata
Zscan4c	caccatgagggaattgacaa
Zscan4c	gtgccttgacttgctcttct
Zscan4c	actcgggaagtctacatgat
Zscan4c	aatcctttggttgttcctcc
Zscan4c	agcaattgttcttgtcctca
Zscan4c	gtagctgcatttctggaagt
Zscan4c	aaagggagtctgacttgttc
Zscan4c	cctcaggctcaggatgatat
Zscan4c	agaatcctgaggaactccat
Zscan4c	gatgttccttgacttgctct
Zscan4c	cattccccaagtgactcttg
Zscan4c	ccttgggtcgttttcagaaa
Zscan4c	ctagactgcaaccctggtac
Zscan4c	gacaggatcagagataggct
Zscan4c	gcctcatgattcttaccaag
Zscan4c	tttgatgactttcacatggt
Zscan4c	agtttggcatctctacagaa
Zscan4c	tggcatgtttgaacatccta
Zscan4c	attcaggtgagttctctggt
Zscan4c	aggtgacacaaagcaattca
Zscan4c	ggtcagagactcgtttgaac
Zscan4c	gtgtatgatctcatgggtgc
Zscan4c	ggctacatagggaacagaca
Zscan4c	ctgtggtaattcctcaggtg
